# Supplementary material for: Genome-Wide Association Study Reveals the Genetic Basis of Duck Plumage Colors
Source: MDPI journal article supplement (doi:10.3390/genes14040856), 2023-03-31
Supplement: s1 [file s1]

## SUPPLEMENTARY INFORMATION

**Table S1.** Genome-wide SNPs associated with black plumage color trait

| SNP ID      | Chromosome | Position  | P-value  | Gene    |
|-------------|------------|-----------|----------|---------|
| 1:31342484  | 1          | 31342484  | 4.08E-09 | NELL2   |
| 1:31346687  | 1          | 31346687  | 2.54E-09 | NELL2   |
| 1:53516478  | 1          | 53516478  | 6.56E-10 | CARD10  |
| 1:94865544  | 1          | 94865544  | 5.84E-10 | PTGFRN  |
| 1:94868866  | 1          | 94868866  | 4.23E-09 | PTGFRN  |
| 1:136032644 | 1          | 136032644 | 5.64E-13 | NA      |
| 1:136032650 | 1          | 136032650 | 3.88E-13 | NA      |
| 1:136032653 | 1          | 136032653 | 3.88E-13 | NA      |
| 1:136032657 | 1          | 136032657 | 3.31E-12 | NA      |
| 1:136032659 | 1          | 136032659 | 3.88E-13 | NA      |
| 1:136032667 | 1          | 136032667 | 1.07E-15 | NA      |
| 1:147626207 | 1          | 147626207 | 4.41E-12 | NA      |
| 1:147629767 | 1          | 147629767 | 2.07E-09 | NA      |
| 1:147630149 | 1          | 147630149 | 6.01E-11 | NA      |
| 1:147630151 | 1          | 147630151 | 6.01E-11 | NA      |
| 1:147630154 | 1          | 147630154 | 6.01E-11 | NA      |
| 2:67044268  | 2          | 67044268  | 6.88E-10 | NA      |
| 3:23231760  | 3          | 23231760  | 1.51E-09 | NA      |
| 3:55495295  | 3          | 55495295  | 4.09E-09 | NA      |
| 3:55495296  | 3          | 55495296  | 3.33E-09 | NA      |
| 3:69817655  | 3          | 69817655  | 9.72E-10 | NA      |
| 3:69817865  | 3          | 69817865  | 1.19E-09 | NA      |
| 3:69817890  | 3          | 69817890  | 5.59E-10 | NA      |
| 3:74873152  | 3          | 74873152  | 2.16E-09 | NA      |
| 3:74873769  | 3          | 74873769  | 2.61E-10 | NA      |
| 3:74875382  | 3          | 74875382  | 9.75E-11 | NA      |
| 3:74875501  | 3          | 74875501  | 8.55E-12 | NA      |
| 3:74876367  | 3          | 74876367  | 5.09E-12 | NA      |
| 3:90536882  | 3          | 90536882  | 9.47E-10 | NA      |
| 3:98873682  | 3          | 98873682  | 1.54E-09 | AKIRIN2 |
| 3:107628359 | 3          | 107628359 | 9.37E-11 | NA      |
| 4:21614761  | 4          | 21614761  | 3.87E-09 | NA      |
| 4:21617220  | 4          | 21617220  | 4.51E-11 | NA      |
| 4:21660201  | 4          | 21660201  | 4.09E-09 | NA      |
| 4:21670809  | 4          | 21670809  | 5.57E-10 | NA      |
| 4:21766289  | 4          | 21766289  | 1.33E-09 | NA      |
| 4:21766320  | 4          | 21766320  | 1.47E-09 | NA      |
| 5:25376130  | 5          | 25376130  | 1.58E-09 | RYR3    |

|             |    |          |          |        |
|-------------|----|----------|----------|--------|
| 5:25493233  | 5  | 25493233 | 2.78E-09 | RYR3   |
| 5:25530667  | 5  | 25530667 | 4.40E-09 | RYR3   |
| 5:25548395  | 5  | 25548395 | 2.58E-09 | RYR3   |
| 5:33115002  | 5  | 33115002 | 3.02E-09 | NA     |
| 7:1487809   | 7  | 1487809  | 5.73E-10 | PGAP1  |
| 7:1489779   | 7  | 1489779  | 4.15E-09 | PGAP1  |
| 7:1489969   | 7  | 1489969  | 3.02E-10 | PGAP1  |
| 7:1490108   | 7  | 1490108  | 1.71E-09 | PGAP1  |
| 7:1490744   | 7  | 1490744  | 1.65E-09 | PGAP1  |
| 7:1495601   | 7  | 1495601  | 2.57E-09 | PGAP1  |
| 7:1496142   | 7  | 1496142  | 9.06E-10 | PGAP1  |
| 7:1497045   | 7  | 1497045  | 1.08E-11 | PGAP1  |
| 8:8294483   | 8  | 8294483  | 3.77E-09 | NA     |
| 10:10022869 | 10 | 10022869 | 2.12E-09 | FRMPD3 |
| 12:20213249 | 12 | 20213249 | 6.15E-10 | TCF25  |
| 12:20213250 | 12 | 20213250 | 6.15E-10 | TCF25  |
| 12:20222793 | 12 | 20222793 | 8.46E-21 | MC1R   |
| 12:20223117 | 12 | 20223117 | 1.12E-25 | MC1R   |
| 13:14082768 | 13 | 14082768 | 2.77E-09 | NA     |
| 13:15933623 | 13 | 15933623 | 1.98E-09 | NA     |
| 18:7771795  | 18 | 7771795  | 1.51E-09 | USP20  |
| 22:6749040  | 22 | 6749040  | 3.38E-09 | NA     |
| 22:6751763  | 22 | 6751763  | 2.92E-10 | NA     |
| 22:6752227  | 22 | 6752227  | 2.21E-10 | NA     |
| 25:3735640  | 25 | 3735640  | 3.33E-10 | NA     |
| 27:1186253  | 27 | 1186253  | 1.37E-09 | NA     |

**Table S2.** Genome-wide SNPs associated with white plumage color trait

| SNP ID      | Chromosome | Position  | P- value | Gene  |
|-------------|------------|-----------|----------|-------|
| 1:67989812  | 1          | 67989812  | 2.85E-10 | NA    |
| 1:68755848  | 1          | 68755848  | 2.28E-10 | NA    |
| 1:69041641  | 1          | 69041641  | 1.86E-09 | NA    |
| 1:69834116  | 1          | 69834116  | 1.37E-11 | NA    |
| 1:70468366  | 1          | 70468366  | 3.11E-09 | WNT7B |
| 1:73405198  | 1          | 73405198  | 1.13E-10 | NA    |
| 1:73591785  | 1          | 73591785  | 5.32E-12 | NA    |
| 1:74192281  | 1          | 74192281  | 2.93E-10 | NA    |
| 1:74594486  | 1          | 74594486  | 4.38E-11 | NA    |
| 1:76447822  | 1          | 76447822  | 2.79E-09 | NA    |
| 1:76614118  | 1          | 76614118  | 7.85E-13 | NA    |
| 1:76804165  | 1          | 76804165  | 5.84E-11 | VWF   |
| 1:76873212  | 1          | 76873212  | 1.54E-09 | NA    |
| 1:140992689 | 1          | 140992689 | 4.80E-10 | MTUS2 |

|             |   |           |          |        |
|-------------|---|-----------|----------|--------|
| 2:20539680  | 2 | 20539680  | 5.76E-12 | CACNB2 |
| 2:74953555  | 2 | 74953555  | 9.90E-10 | NA     |
| 2:103327114 | 2 | 103327114 | 2.10E-09 | NA     |
| 2:103396008 | 2 | 103396008 | 9.68E-10 | NA     |
| 2:103396037 | 2 | 103396037 | 7.46E-10 | NA     |
| 2:103396305 | 2 | 103396305 | 6.38E-10 | NA     |
| 2:103420257 | 2 | 103420257 | 2.21E-09 | NA     |
| 2:103429350 | 2 | 103429350 | 2.55E-09 | NA     |
| 3:1977736   | 3 | 1977736   | 8.39E-11 | NA     |
| 3:97597676  | 3 | 97597676  | 5.97E-09 | NA     |
| 3:97598088  | 3 | 97598088  | 5.07E-09 | NA     |
| 3:97599256  | 3 | 97599256  | 5.63E-09 | NA     |
| 3:97618584  | 3 | 97618584  | 5.19E-09 | CEP162 |
| 3:97619994  | 3 | 97619994  | 7.07E-10 | CEP162 |
| 3:97623229  | 3 | 97623229  | 1.40E-10 | CEP162 |
| 3:97625729  | 3 | 97625729  | 2.47E-09 | CEP162 |
| 3:97626048  | 3 | 97626048  | 5.61E-09 | CEP162 |
| 3:97626066  | 3 | 97626066  | 3.21E-10 | CEP162 |
| 3:97626129  | 3 | 97626129  | 6.82E-11 | CEP162 |
| 3:97632975  | 3 | 97632975  | 8.62E-10 | CEP162 |
| 3:97637880  | 3 | 97637880  | 1.16E-10 | CEP162 |
| 3:97637901  | 3 | 97637901  | 3.76E-09 | CEP162 |
| 3:97641052  | 3 | 97641052  | 1.59E-11 | CEP162 |
| 3:97645677  | 3 | 97645677  | 9.21E-11 | CEP162 |
| 3:97651131  | 3 | 97651131  | 1.14E-09 | CEP162 |
| 3:97654937  | 3 | 97654937  | 1.28E-11 | CEP162 |
| 3:97656911  | 3 | 97656911  | 1.76E-09 | CEP162 |
| 3:97657482  | 3 | 97657482  | 4.41E-09 | CEP162 |
| 3:97659302  | 3 | 97659302  | 4.92E-14 | NA     |
| 3:97706013  | 3 | 97706013  | 5.15E-10 | NA     |
| 3:97708190  | 3 | 97708190  | 1.35E-09 | NA     |
| 3:97708203  | 3 | 97708203  | 3.19E-11 | NA     |
| 3:97716547  | 3 | 97716547  | 2.70E-15 | NA     |
| 3:97716626  | 3 | 97716626  | 1.62E-15 | NA     |
| 3:97718460  | 3 | 97718460  | 9.26E-11 | NA     |
| 3:97719694  | 3 | 97719694  | 4.13E-13 | NA     |
| 3:97719759  | 3 | 97719759  | 3.84E-10 | NA     |
| 3:97724332  | 3 | 97724332  | 1.01E-11 | NA     |
| 3:97729877  | 3 | 97729877  | 4.01E-09 | NA     |
| 3:97733818  | 3 | 97733818  | 1.32E-18 | NA     |
| 3:97734178  | 3 | 97734178  | 1.24E-16 | NA     |
| 3:97735001  | 3 | 97735001  | 5.56E-11 | NA     |
| 3:97735865  | 3 | 97735865  | 7.45E-13 | NA     |
| 3:97737410  | 3 | 97737410  | 7.15E-13 | NA     |

|             |   |           |          |       |
|-------------|---|-----------|----------|-------|
| 3:97737474  | 3 | 97737474  | 2.02E-09 | NA    |
| 3:97739237  | 3 | 97739237  | 3.88E-09 | NA    |
| 3:97740069  | 3 | 97740069  | 1.69E-11 | NA    |
| 3:97746578  | 3 | 97746578  | 3.34E-12 | NA    |
| 3:97755710  | 3 | 97755710  | 2.65E-15 | NA    |
| 3:97756751  | 3 | 97756751  | 4.43E-11 | NA    |
| 3:97758294  | 3 | 97758294  | 2.97E-17 | NA    |
| 3:97758438  | 3 | 97758438  | 9.29E-18 | NA    |
| 3:97758483  | 3 | 97758483  | 4.61E-15 | NA    |
| 3:97758930  | 3 | 97758930  | 6.52E-10 | NA    |
| 3:97761828  | 3 | 97761828  | 2.10E-09 | NA    |
| 3:97762688  | 3 | 97762688  | 1.46E-11 | NA    |
| 3:97763477  | 3 | 97763477  | 6.73E-11 | NA    |
| 3:97763874  | 3 | 97763874  | 8.62E-10 | NA    |
| 3:97763880  | 3 | 97763880  | 8.62E-10 | NA    |
| 3:97764222  | 3 | 97764222  | 1.50E-10 | NA    |
| 3:97764302  | 3 | 97764302  | 1.71E-11 | NA    |
| 3:97764315  | 3 | 97764315  | 4.03E-09 | NA    |
| 3:97764404  | 3 | 97764404  | 2.23E-10 | NA    |
| 3:97764670  | 3 | 97764670  | 2.96E-13 | NA    |
| 3:97764891  | 3 | 97764891  | 3.49E-11 | NA    |
| 3:97765069  | 3 | 97765069  | 1.19E-13 | NA    |
| 3:97767279  | 3 | 97767279  | 6.44E-16 | NA    |
| 3:97768697  | 3 | 97768697  | 5.88E-14 | NA    |
| 3:97768785  | 3 | 97768785  | 4.52E-10 | NA    |
| 3:97769868  | 3 | 97769868  | 2.43E-12 | NA    |
| 3:97773306  | 3 | 97773306  | 6.53E-13 | NA    |
| 3:97774157  | 3 | 97774157  | 2.81E-11 | NA    |
| 3:97774223  | 3 | 97774223  | 7.54E-16 | NA    |
| 3:97775680  | 3 | 97775680  | 2.12E-11 | NA    |
| 3:98055569  | 3 | 98055569  | 3.09E-10 | NA    |
| 3:98055571  | 3 | 98055571  | 3.09E-10 | NA    |
| 3:98081563  | 3 | 98081563  | 2.44E-09 | NA    |
| 3:98092395  | 3 | 98092395  | 2.53E-10 | NA    |
| 3:98131927  | 3 | 98131927  | 6.30E-11 | NA    |
| 3:113303742 | 3 | 113303742 | 6.45E-10 | PKHD1 |
| 3:113305763 | 3 | 113305763 | 1.41E-11 | PKHD1 |
| 3:113307629 | 3 | 113307629 | 1.39E-13 | PKHD1 |
| 3:113307650 | 3 | 113307650 | 5.21E-15 | PKHD1 |
| 3:113307830 | 3 | 113307830 | 4.39E-09 | PKHD1 |
| 3:113312999 | 3 | 113312999 | 1.38E-10 | PKHD1 |
| 3:113313962 | 3 | 113313962 | 1.29E-09 | PKHD1 |
| 3:113314425 | 3 | 113314425 | 3.33E-09 | PKHD1 |
| 3:113315920 | 3 | 113315920 | 3.82E-10 | PKHD1 |

|             |   |           |          |       |
|-------------|---|-----------|----------|-------|
| 3:113327709 | 3 | 113327709 | 8.86E-10 | PKHD1 |
| 3:113333806 | 3 | 113333806 | 4.50E-09 | PKHD1 |
| 3:113359406 | 3 | 113359406 | 1.31E-12 | PKHD1 |
| 3:113359980 | 3 | 113359980 | 5.76E-09 | PKHD1 |
| 3:113368805 | 3 | 113368805 | 8.48E-10 | PKHD1 |
| 3:113368828 | 3 | 113368828 | 1.40E-09 | PKHD1 |
| 3:113368834 | 3 | 113368834 | 1.40E-09 | PKHD1 |
| 3:113375100 | 3 | 113375100 | 1.20E-09 | PKHD1 |
| 3:113375104 | 3 | 113375104 | 1.20E-09 | PKHD1 |
| 3:113382936 | 3 | 113382936 | 5.07E-09 | PKHD1 |
| 3:113386535 | 3 | 113386535 | 2.47E-09 | PKHD1 |
| 3:113401659 | 3 | 113401659 | 1.70E-09 | PKHD1 |
| 4:23106802  | 4 | 23106802  | 1.00E-09 | NA    |
| 4:33958344  | 4 | 33958344  | 1.30E-09 | NA    |
| 4:33980544  | 4 | 33980544  | 1.05E-10 | SLIT2 |
| 4:34070699  | 4 | 34070699  | 4.80E-09 | SLIT2 |
| 4:35725648  | 4 | 35725648  | 9.17E-10 | NA    |
| 4:62404125  | 4 | 62404125  | 4.74E-09 | NA    |
| 4:62821084  | 4 | 62821084  | 4.74E-09 | NA    |
| 4:63027059  | 4 | 63027059  | 1.14E-11 | PDGFC |
| 4:63239857  | 4 | 63239857  | 9.74E-10 | GRIA2 |
| 4:65599955  | 4 | 65599955  | 8.10E-10 | NA    |
| 5:33447645  | 5 | 33447645  | 1.77E-09 | NA    |
| 5:40339047  | 5 | 40339047  | 3.61E-09 | DLST  |
| 5:40339181  | 5 | 40339181  | 1.70E-11 | DLST  |
| 5:40339281  | 5 | 40339281  | 4.64E-10 | DLST  |
| 5:40339798  | 5 | 40339798  | 3.16E-11 | DLST  |
| 5:40341539  | 5 | 40341539  | 3.10E-11 | DLST  |
| 5:40341556  | 5 | 40341556  | 3.10E-11 | DLST  |
| 5:40341969  | 5 | 40341969  | 4.84E-09 | DLST  |
| 5:40341980  | 5 | 40341980  | 4.84E-09 | DLST  |
| 5:40341996  | 5 | 40341996  | 3.37E-10 | DLST  |
| 5:40342044  | 5 | 40342044  | 9.36E-13 | DLST  |
| 5:40342060  | 5 | 40342060  | 1.98E-13 | DLST  |
| 5:40342102  | 5 | 40342102  | 1.05E-09 | DLST  |
| 5:40342551  | 5 | 40342551  | 1.57E-10 | DLST  |
| 5:40342730  | 5 | 40342730  | 1.38E-09 | DLST  |
| 5:40343377  | 5 | 40343377  | 2.52E-12 | DLST  |
| 5:40736197  | 5 | 40736197  | 2.94E-09 | NA    |
| 5:40740823  | 5 | 40740823  | 5.65E-09 | NA    |
| 5:40746009  | 5 | 40746009  | 1.73E-09 | NA    |
| 5:40746515  | 5 | 40746515  | 1.70E-09 | NA    |
| 5:40749063  | 5 | 40749063  | 8.82E-11 | NA    |
| 5:40750286  | 5 | 40750286  | 1.18E-22 | NA    |

|            |   |          |          |    |
|------------|---|----------|----------|----|
| 5:40750296 | 5 | 40750296 | 1.18E-22 | NA |
| 5:40750530 | 5 | 40750530 | 1.83E-15 | NA |
| 5:40750641 | 5 | 40750641 | 3.84E-11 | NA |
| 5:40758393 | 5 | 40758393 | 1.75E-15 | NA |
| 5:40758489 | 5 | 40758489 | 3.67E-13 | NA |
| 5:40758492 | 5 | 40758492 | 3.67E-13 | NA |
| 5:40758650 | 5 | 40758650 | 4.95E-12 | NA |
| 5:40759084 | 5 | 40759084 | 8.89E-12 | NA |
| 5:40759459 | 5 | 40759459 | 3.75E-11 | NA |
| 5:40760234 | 5 | 40760234 | 8.27E-10 | NA |
| 5:40760276 | 5 | 40760276 | 1.19E-09 | NA |
| 5:40760732 | 5 | 40760732 | 1.30E-12 | NA |
| 5:40761156 | 5 | 40761156 | 5.91E-21 | NA |
| 5:40761617 | 5 | 40761617 | 7.03E-18 | NA |
| 5:40762245 | 5 | 40762245 | 7.29E-10 | NA |
| 5:40763173 | 5 | 40763173 | 2.06E-15 | NA |
| 5:40763537 | 5 | 40763537 | 6.93E-13 | NA |
| 5:40763591 | 5 | 40763591 | 1.31E-09 | NA |
| 5:40763598 | 5 | 40763598 | 2.54E-09 | NA |
| 5:40763693 | 5 | 40763693 | 2.51E-14 | NA |
| 5:40763702 | 5 | 40763702 | 2.51E-14 | NA |
| 5:40763723 | 5 | 40763723 | 9.67E-15 | NA |
| 5:40765372 | 5 | 40765372 | 2.33E-09 | NA |
| 5:40766699 | 5 | 40766699 | 2.84E-09 | NA |
| 5:40767104 | 5 | 40767104 | 2.06E-11 | NA |
| 5:40768315 | 5 | 40768315 | 9.33E-17 | NA |
| 5:40768573 | 5 | 40768573 | 2.31E-16 | NA |
| 5:40768760 | 5 | 40768760 | 1.87E-13 | NA |
| 5:40770343 | 5 | 40770343 | 8.47E-14 | NA |
| 5:40771044 | 5 | 40771044 | 2.53E-10 | NA |
| 5:40772477 | 5 | 40772477 | 2.69E-09 | NA |
| 5:40773796 | 5 | 40773796 | 3.66E-10 | NA |
| 5:40775592 | 5 | 40775592 | 2.92E-11 | NA |
| 5:40775679 | 5 | 40775679 | 6.51E-16 | NA |
| 5:40776116 | 5 | 40776116 | 4.26E-15 | NA |
| 5:40776299 | 5 | 40776299 | 8.43E-14 | NA |
| 5:40778024 | 5 | 40778024 | 1.25E-11 | NA |
| 5:40779327 | 5 | 40779327 | 5.57E-09 | NA |
| 5:40780383 | 5 | 40780383 | 4.08E-10 | NA |
| 5:40780403 | 5 | 40780403 | 4.89E-11 | NA |
| 5:40782087 | 5 | 40782087 | 1.10E-10 | NA |
| 5:40782385 | 5 | 40782385 | 2.68E-10 | NA |
| 5:40783925 | 5 | 40783925 | 1.69E-13 | NA |
| 5:40784035 | 5 | 40784035 | 8.90E-11 | NA |

|            |   |          |          |         |
|------------|---|----------|----------|---------|
| 5:40784116 | 5 | 40784116 | 1.38E-09 | NA      |
| 5:40784128 | 5 | 40784128 | 1.38E-09 | NA      |
| 5:40784129 | 5 | 40784129 | 1.38E-09 | NA      |
| 6:1899118  | 6 | 1899118  | 1.38E-09 | NA      |
| 6:2009654  | 6 | 2009654  | 1.82E-09 | NA      |
| 6:2014655  | 6 | 2014655  | 3.66E-11 | NA      |
| 6:2014709  | 6 | 2014709  | 1.30E-11 | NA      |
| 6:2017709  | 6 | 2017709  | 3.30E-14 | NA      |
| 6:2020830  | 6 | 2020830  | 2.43E-09 | NA      |
| 6:16592716 | 6 | 16592716 | 4.99E-09 | HERC4   |
| 7:18342844 | 7 | 18342844 | 9.29E-11 | SLC49A4 |
| 7:18343709 | 7 | 18343709 | 1.04E-12 | SLC49A4 |
| 7:18344243 | 7 | 18344243 | 1.49E-15 | SLC49A4 |
| 7:18359372 | 7 | 18359372 | 4.39E-10 | SLC49A4 |
| 7:18360457 | 7 | 18360457 | 2.74E-10 | SLC49A4 |
| 7:18360481 | 7 | 18360481 | 1.34E-09 | SLC49A4 |
| 7:18360492 | 7 | 18360492 | 6.91E-10 | SLC49A4 |
| 7:18361077 | 7 | 18361077 | 4.60E-09 | SLC49A4 |
| 7:18361112 | 7 | 18361112 | 1.93E-09 | SLC49A4 |
| 7:18374006 | 7 | 18374006 | 4.21E-09 | NA      |
| 7:18374028 | 7 | 18374028 | 5.88E-10 | NA      |
| 7:18374086 | 7 | 18374086 | 6.90E-11 | NA      |
| 7:18374091 | 7 | 18374091 | 1.21E-10 | NA      |
| 7:18374114 | 7 | 18374114 | 3.17E-09 | NA      |
| 7:18374253 | 7 | 18374253 | 3.00E-10 | NA      |
| 7:18374940 | 7 | 18374940 | 7.68E-10 | NA      |
| 7:18380469 | 7 | 18380469 | 3.24E-13 | NA      |
| 7:18430362 | 7 | 18430362 | 1.17E-09 | SEMA5B  |
| 7:18430412 | 7 | 18430412 | 1.19E-09 | SEMA5B  |
| 7:18430574 | 7 | 18430574 | 2.66E-10 | SEMA5B  |
| 7:18430711 | 7 | 18430711 | 9.29E-10 | SEMA5B  |
| 7:18430732 | 7 | 18430732 | 9.23E-11 | SEMA5B  |
| 7:18430776 | 7 | 18430776 | 3.03E-11 | SEMA5B  |
| 7:18431104 | 7 | 18431104 | 4.41E-11 | SEMA5B  |
| 7:18431372 | 7 | 18431372 | 8.95E-12 | SEMA5B  |
| 7:18431413 | 7 | 18431413 | 3.55E-11 | SEMA5B  |
| 7:18431710 | 7 | 18431710 | 5.51E-10 | SEMA5B  |
| 7:18431751 | 7 | 18431751 | 1.89E-09 | SEMA5B  |
| 7:18434231 | 7 | 18434231 | 1.42E-09 | SEMA5B  |
| 7:18438781 | 7 | 18438781 | 4.80E-09 | SEMA5B  |
| 7:18443860 | 7 | 18443860 | 1.82E-11 | SEMA5B  |
| 7:18445525 | 7 | 18445525 | 4.52E-10 | SEMA5B  |
| 7:18453106 | 7 | 18453106 | 1.66E-13 | SEMA5B  |
| 7:18477662 | 7 | 18477662 | 4.34E-09 | SEMA5B  |

|            |   |          |          |         |
|------------|---|----------|----------|---------|
| 7:18477663 | 7 | 18477663 | 4.34E-09 | SEMA5B  |
| 7:18478141 | 7 | 18478141 | 2.35E-10 | SEMA5B  |
| 7:18478149 | 7 | 18478149 | 2.79E-10 | SEMA5B  |
| 7:18482590 | 7 | 18482590 | 8.51E-13 | SEMA5B  |
| 7:18483486 | 7 | 18483486 | 3.33E-13 | SEMA5B  |
| 7:18483708 | 7 | 18483708 | 7.36E-14 | SEMA5B  |
| 7:18484740 | 7 | 18484740 | 2.85E-09 | SEMA5B  |
| 7:18485845 | 7 | 18485845 | 1.06E-13 | SEMA5B  |
| 7:18486098 | 7 | 18486098 | 2.11E-16 | SEMA5B  |
| 7:18486103 | 7 | 18486103 | 6.90E-16 | SEMA5B  |
| 7:18488139 | 7 | 18488139 | 4.69E-09 | SEMA5B  |
| 7:18489070 | 7 | 18489070 | 3.90E-12 | SEMA5B  |
| 7:18499478 | 7 | 18499478 | 5.19E-09 | SEMA5B  |
| 7:18499479 | 7 | 18499479 | 3.89E-09 | SEMA5B  |
| 7:18500837 | 7 | 18500837 | 6.16E-13 | NA      |
| 7:18500838 | 7 | 18500838 | 6.16E-13 | NA      |
| 7:18505056 | 7 | 18505056 | 2.03E-10 | NA      |
| 7:18537129 | 7 | 18537129 | 8.45E-13 | NA      |
| 7:18537533 | 7 | 18537533 | 2.73E-11 | NA      |
| 7:18615490 | 7 | 18615490 | 1.41E-12 | NA      |
| 7:18624738 | 7 | 18624738 | 2.60E-09 | NA      |
| 7:18630491 | 7 | 18630491 | 8.25E-12 | NA      |
| 7:18631502 | 7 | 18631502 | 5.60E-09 | NA      |
| 7:18635638 | 7 | 18635638 | 2.59E-11 | NA      |
| 7:18643043 | 7 | 18643043 | 7.14E-12 | NA      |
| 7:18648606 | 7 | 18648606 | 6.37E-10 | NA      |
| 7:27886962 | 7 | 27886962 | 1.02E-10 | NA      |
| 7:27894350 | 7 | 27894350 | 3.45E-09 | NA      |
| 7:27897265 | 7 | 27897265 | 5.14E-11 | NA      |
| 7:27934239 | 7 | 27934239 | 4.96E-15 | NA      |
| 7:27950812 | 7 | 27950812 | 4.86E-09 | ZNF385B |
| 7:28022066 | 7 | 28022066 | 3.35E-09 | ZNF385B |
| 7:28028059 | 7 | 28028059 | 4.02E-09 | ZNF385B |
| 7:28090593 | 7 | 28090593 | 1.50E-09 | ZNF385B |
| 7:33030200 | 7 | 33030200 | 5.15E-09 | ACVR2A  |
| 7:33030202 | 7 | 33030202 | 5.15E-09 | ACVR2A  |
| 7:33030206 | 7 | 33030206 | 5.15E-09 | ACVR2A  |
| 7:33030210 | 7 | 33030210 | 5.15E-09 | ACVR2A  |
| 8:25582988 | 8 | 25582988 | 8.85E-12 | NA      |
| 8:28180119 | 8 | 28180119 | 3.51E-09 | NA      |
| 8:28181078 | 8 | 28181078 | 7.02E-10 | NA      |
| 8:28182195 | 8 | 28182195 | 4.35E-10 | NA      |
| 8:28500750 | 8 | 28500750 | 2.08E-14 | NA      |
| 9:5336598  | 9 | 5336598  | 2.16E-09 | LPP     |

|             |    |          |          |       |
|-------------|----|----------|----------|-------|
| 9:5479241   | 9  | 5479241  | 8.11E-10 | NA    |
| 9:5479248   | 9  | 5479248  | 8.11E-10 | NA    |
| 11:18490095 | 11 | 18490095 | 4.36E-09 | PCSK6 |
| 12:8118077  | 12 | 8118077  | 3.38E-09 | ADCY7 |
| 12:11414449 | 12 | 11414449 | 7.00E-13 | NA    |
| 12:11429694 | 12 | 11429694 | 1.70E-09 | NA    |
| 12:11437838 | 12 | 11437838 | 9.72E-14 | GPI   |
| 12:11439703 | 12 | 11439703 | 8.06E-11 | GPI   |
| 12:11443345 | 12 | 11443345 | 1.44E-11 | GPI   |
| 12:11454713 | 12 | 11454713 | 3.25E-11 | NA    |
| 12:11458763 | 12 | 11458763 | 6.88E-11 | NA    |
| 12:11462280 | 12 | 11462280 | 6.73E-12 | NA    |
| 12:11466191 | 12 | 11466191 | 4.23E-09 | NA    |
| 12:11468042 | 12 | 11468042 | 2.32E-12 | NA    |
| 12:11471103 | 12 | 11471103 | 4.39E-11 | NA    |
| 12:11482925 | 12 | 11482925 | 7.03E-11 | NA    |
| 12:11485882 | 12 | 11485882 | 5.14E-13 | NA    |
| 12:11497520 | 12 | 11497520 | 1.61E-14 | NA    |
| 12:11507779 | 12 | 11507779 | 1.33E-09 | NA    |
| 12:11512281 | 12 | 11512281 | 3.21E-11 | NA    |
| 12:11527234 | 12 | 11527234 | 1.01E-09 | WTIP  |
| 12:11533004 | 12 | 11533004 | 4.25E-11 | WTIP  |
| 12:11538584 | 12 | 11538584 | 8.82E-10 | WTIP  |
| 12:11538613 | 12 | 11538613 | 1.20E-09 | WTIP  |
| 12:11539010 | 12 | 11539010 | 1.51E-09 | WTIP  |
| 12:11539391 | 12 | 11539391 | 8.42E-13 | WTIP  |
| 12:11539711 | 12 | 11539711 | 2.81E-10 | WTIP  |
| 12:11546332 | 12 | 11546332 | 2.02E-11 | WTIP  |
| 12:11549780 | 12 | 11549780 | 3.87E-09 | WTIP  |
| 12:11554279 | 12 | 11554279 | 1.88E-11 | WTIP  |
| 12:11556056 | 12 | 11556056 | 1.91E-10 | WTIP  |
| 12:11557704 | 12 | 11557704 | 4.52E-09 | WTIP  |
| 12:11560635 | 12 | 11560635 | 3.13E-10 | WTIP  |
| 12:11561718 | 12 | 11561718 | 7.43E-11 | WTIP  |
| 12:11562441 | 12 | 11562441 | 1.65E-14 | WTIP  |
| 12:11564021 | 12 | 11564021 | 2.18E-11 | WTIP  |
| 12:11567578 | 12 | 11567578 | 7.22E-13 | WTIP  |
| 12:11569730 | 12 | 11569730 | 1.41E-09 | WTIP  |
| 12:11569908 | 12 | 11569908 | 8.59E-13 | WTIP  |
| 12:11570971 | 12 | 11570971 | 1.68E-11 | WTIP  |
| 12:11571905 | 12 | 11571905 | 6.06E-12 | WTIP  |
| 12:11573132 | 12 | 11573132 | 1.17E-09 | WTIP  |
| 12:11573395 | 12 | 11573395 | 9.33E-13 | WTIP  |
| 12:11573738 | 12 | 11573738 | 2.16E-09 | WTIP  |

|             |    |          |          |       |
|-------------|----|----------|----------|-------|
| 12:11575479 | 12 | 11575479 | 6.69E-11 | WTIP  |
| 12:11576711 | 12 | 11576711 | 3.25E-11 | WTIP  |
| 12:11577157 | 12 | 11577157 | 2.23E-11 | WTIP  |
| 13:7443936  | 13 | 7443936  | 2.21E-09 | ITIH4 |
| 13:7538806  | 13 | 7538806  | 2.89E-09 | NA    |
| 13:9704572  | 13 | 9704572  | 2.10E-13 | NA    |
| 13:10134372 | 13 | 10134372 | 3.28E-09 | MGLL  |
| 13:10146103 | 13 | 10146103 | 8.48E-14 | MGLL  |
| 13:11847388 | 13 | 11847388 | 2.22E-09 | NA    |
| 13:11847389 | 13 | 11847389 | 2.22E-09 | NA    |
| 13:11847392 | 13 | 11847392 | 2.06E-10 | NA    |
| 13:11847393 | 13 | 11847393 | 2.06E-10 | NA    |
| 13:11847403 | 13 | 11847403 | 2.34E-09 | NA    |
| 13:11950016 | 13 | 11950016 | 2.33E-09 | NA    |
| 13:11954874 | 13 | 11954874 | 2.42E-09 | NA    |
| 13:11954883 | 13 | 11954883 | 1.68E-10 | NA    |
| 13:11975819 | 13 | 11975819 | 2.07E-10 | NA    |
| 13:11980770 | 13 | 11980770 | 3.82E-20 | ARL8B |
| 13:11982812 | 13 | 11982812 | 1.59E-12 | ARL8B |
| 13:11982818 | 13 | 11982818 | 1.59E-12 | ARL8B |
| 13:11982822 | 13 | 11982822 | 1.59E-12 | ARL8B |
| 13:11982827 | 13 | 11982827 | 1.59E-12 | ARL8B |
| 13:11982878 | 13 | 11982878 | 9.19E-52 | ARL8B |
| 13:11982968 | 13 | 11982968 | 8.57E-11 | ARL8B |
| 13:11983006 | 13 | 11983006 | 4.48E-16 | ARL8B |
| 13:11985159 | 13 | 11985159 | 6.82E-14 | ARL8B |
| 13:11985432 | 13 | 11985432 | 2.73E-11 | ARL8B |
| 13:11985865 | 13 | 11985865 | 2.40E-12 | ARL8B |
| 13:11985927 | 13 | 11985927 | 5.97E-09 | ARL8B |
| 13:11985938 | 13 | 11985938 | 2.10E-13 | ARL8B |
| 13:11986165 | 13 | 11986165 | 2.03E-10 | ARL8B |
| 13:11986442 | 13 | 11986442 | 3.26E-52 | ARL8B |
| 13:11986592 | 13 | 11986592 | 1.74E-12 | ARL8B |
| 13:11986601 | 13 | 11986601 | 8.82E-12 | ARL8B |
| 13:11986689 | 13 | 11986689 | 1.26E-11 | ARL8B |
| 13:11988714 | 13 | 11988714 | 4.23E-49 | ARL8B |
| 13:11989419 | 13 | 11989419 | 1.53E-13 | ARL8B |
| 13:11991274 | 13 | 11991274 | 4.89E-11 | ARL8B |
| 13:11991275 | 13 | 11991275 | 1.76E-12 | ARL8B |
| 13:11991283 | 13 | 11991283 | 1.45E-10 | ARL8B |
| 13:11991291 | 13 | 11991291 | 2.24E-14 | ARL8B |
| 13:12044219 | 13 | 12044219 | 2.73E-09 | NA    |
| 13:12044361 | 13 | 12044361 | 6.60E-10 | NA    |
| 13:12044780 | 13 | 12044780 | 1.35E-10 | NA    |

|             |    |          |          |        |
|-------------|----|----------|----------|--------|
| 13:12131521 | 13 | 12131521 | 1.12E-09 | ITPR1  |
| 13:12131739 | 13 | 12131739 | 3.79E-13 | ITPR1  |
| 13:12132015 | 13 | 12132015 | 6.01E-16 | ITPR1  |
| 13:12132145 | 13 | 12132145 | 1.80E-11 | ITPR1  |
| 13:12132187 | 13 | 12132187 | 1.91E-17 | ITPR1  |
| 13:12132233 | 13 | 12132233 | 1.72E-19 | ITPR1  |
| 13:12132285 | 13 | 12132285 | 3.29E-12 | ITPR1  |
| 13:12147574 | 13 | 12147574 | 2.76E-19 | ITPR1  |
| 13:12156389 | 13 | 12156389 | 2.50E-11 | ITPR1  |
| 13:12156704 | 13 | 12156704 | 3.87E-10 | ITPR1  |
| 13:13300326 | 13 | 13300326 | 8.45E-10 | NA     |
| 13:13309261 | 13 | 13309261 | 1.13E-09 | NA     |
| 13:13325004 | 13 | 13325004 | 2.29E-09 | NA     |
| 13:14289145 | 13 | 14289145 | 2.44E-10 | PPP4R2 |
| 13:14289159 | 13 | 14289159 | 2.44E-10 | PPP4R2 |
| 13:14289163 | 13 | 14289163 | 4.52E-10 | PPP4R2 |
| 13:15399026 | 13 | 15399026 | 5.56E-58 | MITF   |
| 13:15399414 | 13 | 15399414 | 0.00E+00 | MITF   |
| 13:15399439 | 13 | 15399439 | 0.00E+00 | MITF   |
| 13:15399625 | 13 | 15399625 | 1.81E-66 | MITF   |
| 13:15399727 | 13 | 15399727 | 5.41E-55 | MITF   |
| 13:15399791 | 13 | 15399791 | 1.70E-77 | MITF   |
| 13:15399795 | 13 | 15399795 | 1.70E-77 | MITF   |
| 13:15399953 | 13 | 15399953 | 9.40E-24 | MITF   |
| 13:15399955 | 13 | 15399955 | 2.22E-32 | MITF   |
| 13:15400127 | 13 | 15400127 | 1.70E-77 | MITF   |
| 13:15400396 | 13 | 15400396 | 2.01E-82 | MITF   |
| 13:15402575 | 13 | 15402575 | 1.57E-25 | MITF   |
| 13:15403282 | 13 | 15403282 | 4.80E-60 | MITF   |
| 13:15404023 | 13 | 15404023 | 7.39E-63 | MITF   |
| 13:15404980 | 13 | 15404980 | 5.56E-58 | MITF   |
| 13:15411160 | 13 | 15411160 | 5.60E-10 | MITF   |
| 13:15411658 | 13 | 15411658 | 6.52E-63 | MITF   |
| 13:15411837 | 13 | 15411837 | 7.03E-14 | MITF   |
| 13:15412000 | 13 | 15412000 | 2.38E-14 | MITF   |
| 13:15412425 | 13 | 15412425 | 2.68E-22 | MITF   |
| 13:15412428 | 13 | 15412428 | 2.79E-10 | MITF   |
| 13:15412570 | 13 | 15412570 | 1.06E-50 | MITF   |
| 13:15412592 | 13 | 15412592 | 2.31E-39 | MITF   |
| 13:15412878 | 13 | 15412878 | 3.95E-21 | MITF   |
| 13:15412950 | 13 | 15412950 | 7.34E-23 | MITF   |
| 13:15412967 | 13 | 15412967 | 4.11E-12 | MITF   |
| 13:15413071 | 13 | 15413071 | 9.31E-30 | MITF   |
| 13:15413199 | 13 | 15413199 | 2.11E-42 | MITF   |

|             |    |          |          |          |
|-------------|----|----------|----------|----------|
| 13:15413219 | 13 | 15413219 | 2.11E-42 | MITF     |
| 13:15413509 | 13 | 15413509 | 3.78E-26 | MITF     |
| 13:15413626 | 13 | 15413626 | 1.61E-14 | MITF     |
| 13:15413700 | 13 | 15413700 | 3.69E-17 | MITF     |
| 13:15413811 | 13 | 15413811 | 1.06E-50 | MITF     |
| 13:15413853 | 13 | 15413853 | 9.35E-23 | MITF     |
| 13:15414262 | 13 | 15414262 | 1.87E-62 | MITF     |
| 13:15414267 | 13 | 15414267 | 1.87E-62 | MITF     |
| 13:15415825 | 13 | 15415825 | 1.95E-19 | MITF     |
| 13:15416145 | 13 | 15416145 | 1.68E-36 | MITF     |
| 13:15417373 | 13 | 15417373 | 2.18E-28 | MITF     |
| 13:15417813 | 13 | 15417813 | 5.56E-58 | MITF     |
| 13:15417918 | 13 | 15417918 | 2.65E-41 | MITF     |
| 13:15418049 | 13 | 15418049 | 7.76E-34 | MITF     |
| 13:15418199 | 13 | 15418199 | 6.56E-12 | MITF     |
| 13:15418646 | 13 | 15418646 | 2.83E-22 | MITF     |
| 13:15418785 | 13 | 15418785 | 3.14E-43 | MITF     |
| 13:15419385 | 13 | 15419385 | 7.39E-63 | MITF     |
| 13:15421039 | 13 | 15421039 | 2.63E-26 | MITF     |
| 13:15421572 | 13 | 15421572 | 5.31E-19 | MITF     |
| 13:15421679 | 13 | 15421679 | 2.90E-39 | MITF     |
| 13:15421717 | 13 | 15421717 | 1.40E-13 | MITF     |
| 13:15421903 | 13 | 15421903 | 2.69E-11 | MITF     |
| 13:15421983 | 13 | 15421983 | 9.41E-13 | MITF     |
| 13:15422029 | 13 | 15422029 | 5.49E-38 | MITF     |
| 13:15424125 | 13 | 15424125 | 4.45E-29 | MITF     |
| 13:15425177 | 13 | 15425177 | 2.25E-45 | MITF     |
| 13:15426452 | 13 | 15426452 | 4.33E-11 | MITF     |
| 13:15491773 | 13 | 15491773 | 1.05E-09 | NA       |
| 13:15499802 | 13 | 15499802 | 6.65E-10 | NA       |
| 13:15520054 | 13 | 15520054 | 3.40E-09 | NA       |
| 13:15520770 | 13 | 15520770 | 7.86E-10 | NA       |
| 13:16668662 | 13 | 16668662 | 9.45E-10 | SLC25A26 |
| 13:16671127 | 13 | 16671127 | 2.78E-10 | SLC25A26 |
| 13:16991098 | 13 | 16991098 | 2.95E-10 | MAGI1    |
| 13:18266118 | 13 | 18266118 | 1.11E-11 | PTPRG    |
| 13:18266119 | 13 | 18266119 | 1.11E-11 | PTPRG    |
| 13:18283850 | 13 | 18283850 | 5.81E-09 | PTPRG    |
| 13:18308347 | 13 | 18308347 | 5.89E-10 | PTPRG    |
| 13:18308395 | 13 | 18308395 | 1.05E-09 | PTPRG    |
| 13:18313164 | 13 | 18313164 | 1.36E-09 | PTPRG    |
| 13:18325053 | 13 | 18325053 | 1.22E-09 | PTPRG    |
| 13:18329396 | 13 | 18329396 | 8.50E-10 | PTPRG    |
| 13:18338031 | 13 | 18338031 | 5.68E-09 | PTPRG    |

|             |    |          |          |          |
|-------------|----|----------|----------|----------|
| 13:18344145 | 13 | 18344145 | 5.96E-09 | PTPRG    |
| 13:18346733 | 13 | 18346733 | 2.76E-10 | PTPRG    |
| 13:18356239 | 13 | 18356239 | 4.32E-09 | PTPRG    |
| 13:18356933 | 13 | 18356933 | 3.09E-09 | PTPRG    |
| 13:18365497 | 13 | 18365497 | 4.01E-09 | PTPRG    |
| 13:18366825 | 13 | 18366825 | 1.72E-09 | PTPRG    |
| 13:18375126 | 13 | 18375126 | 4.81E-09 | PTPRG    |
| 13:18376495 | 13 | 18376495 | 2.64E-09 | PTPRG    |
| 13:18383953 | 13 | 18383953 | 6.01E-09 | PTPRG    |
| 13:18391936 | 13 | 18391936 | 4.93E-10 | PTPRG    |
| 13:18413222 | 13 | 18413222 | 1.66E-10 | PTPRG    |
| 13:18413672 | 13 | 18413672 | 1.81E-09 | PTPRG    |
| 13:18416582 | 13 | 18416582 | 7.33E-10 | PTPRG    |
| 13:18416630 | 13 | 18416630 | 6.28E-10 | PTPRG    |
| 13:18418084 | 13 | 18418084 | 2.72E-10 | PTPRG    |
| 13:19733009 | 13 | 19733009 | 6.82E-10 | QRICH1   |
| 13:19733037 | 13 | 19733037 | 5.51E-10 | QRICH1   |
| 13:20472421 | 13 | 20472421 | 3.04E-09 | NA       |
| 14:17934715 | 14 | 17934715 | 2.71E-09 | ARHGAP26 |
| 16:5522302  | 16 | 5522302  | 3.12E-09 | NA       |
| 18:6001070  | 18 | 6001070  | 6.21E-10 | NA       |
| 18:7586264  | 18 | 7586264  | 9.24E-11 | NA       |
| 18:9162010  | 18 | 9162010  | 4.66E-09 | NA       |
| 18:11239371 | 18 | 11239371 | 3.22E-09 | MVB12B   |
| 18:11240147 | 18 | 11240147 | 2.67E-09 | MVB12B   |
| 18:11246457 | 18 | 11246457 | 4.13E-09 | NA       |
| 18:11256062 | 18 | 11256062 | 1.77E-09 | NA       |
| 18:11259658 | 18 | 11259658 | 8.79E-10 | NA       |
| 18:11269611 | 18 | 11269611 | 2.87E-09 | NA       |
| 18:11269842 | 18 | 11269842 | 4.29E-09 | NA       |
| 18:11296444 | 18 | 11296444 | 1.86E-09 | NA       |
| 18:11296926 | 18 | 11296926 | 2.22E-13 | NA       |
| 18:11317379 | 18 | 11317379 | 1.70E-10 | NA       |
| 19:3099743  | 19 | 3099743  | 1.37E-09 | NA       |
| 19:12195339 | 19 | 12195339 | 1.25E-09 | NA       |
| 29:1994431  | 29 | 1994431  | 2.99E-10 | NA       |
| 29:2423462  | 29 | 2423462  | 3.10E-09 | NA       |

---
